# Supplementary material for: Gene expression profiling of brains from bovine spongiform encephalopathy (BSE)-infected cynomolgus macaques
Source: PubMed Central journal article supplement (PMC4061447; doi:10.1186/1471-2164-15-434), 2014-06-05

**A**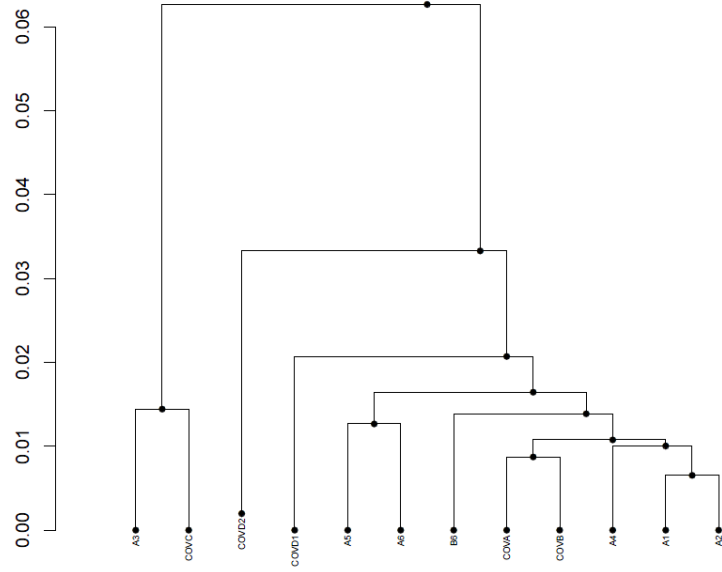**B**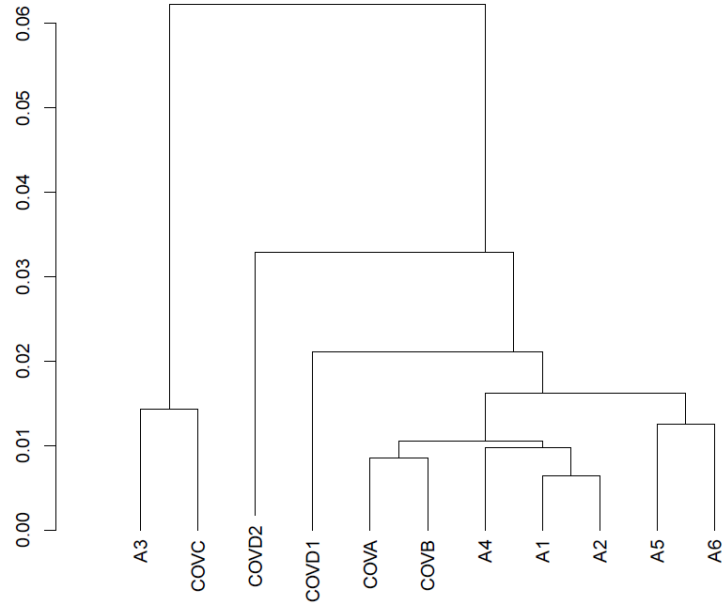

Supplement: 12864_2014_6117_MOESM7_ESM.pdf [file 12864_2014_6117_MOESM7_ESM.pdf]
